# Supplementary material
Source: Springer Nature journal article supplement (https://mijn.bsl.nl/resource/supplementary/13047_2008_12_MOESM2_ESM.pdf/7108724)

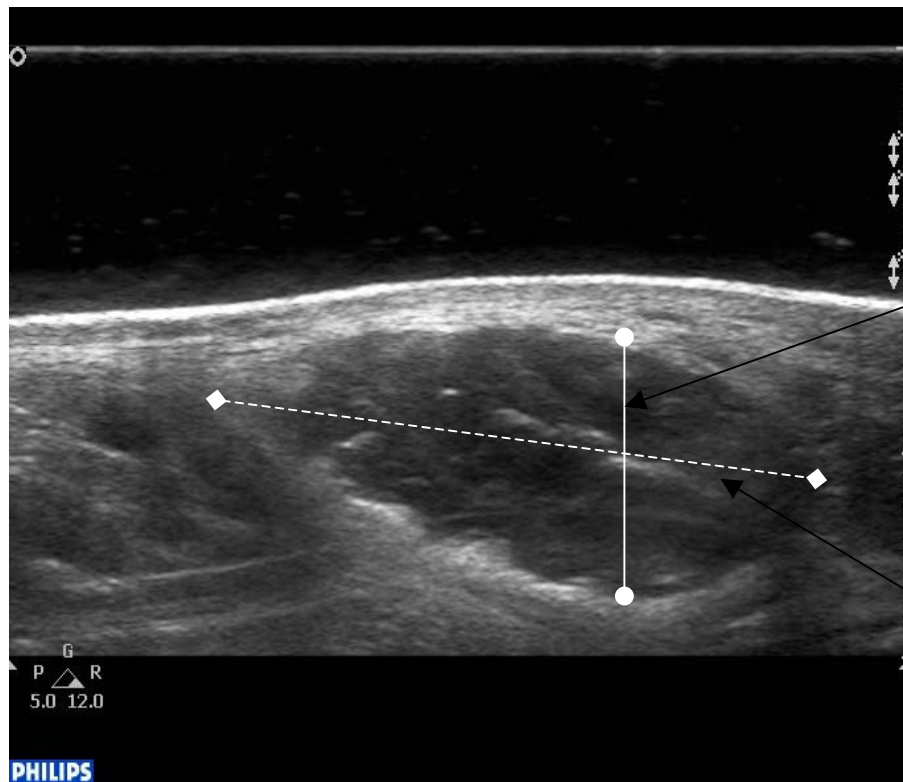

Dorso-plantar  
thickness

Medio-lateral  
width

G  
P  R  
5.0 12.0

PHILIPS

Supplement: MOESM2 [file 7108724]
